# Supplementary material for: GateView: A Multi-Omics Platform for Gene Feature Analysis of Virus Receptors within Human Normal Tissues and Tumors
Source: MDPI journal article supplement (doi:10.3390/biom14050516), 2024-04-25
Supplement: s1 [file s1]

# GateView: A Multi-Omics Platform for Gene Feature Analysis of Virus Receptors within Human Normal Tissues and Tumors

Yang Sun †, Zi-Liang Huang †, Wen-Xin Chen †, Yi-Feng Zhang, Hao-Tian Lei, Qiao-Juan Huang, Zhao-Rong Lun, Liang-Hu Qu \* and Ling-Ling Zheng \*

MOE Key Laboratory of Gene Function and Regulation, State Key Laboratory for Biocontrol, School of Life Sciences, Sun Yat-sen University, Guangzhou 510275, China; suny335@mail2.sysu.edu.cn (Y.S.); hziliang@mail2.sysu.edu.cn (Z.-L.H.); wc645@cornell.edu (W.-X.C.); zhangyf326@mail2.sysu.edu.cn (Y.-F.Z.); leiht@mail2.sysu.edu.cn (H.-T.L.); huangqj@mail.sysu.edu.cn (Q.-J.H.); lsslr@mail.sysu.edu.cn (Z.-R.L.)

\* Correspondence: lssqlh@mail.sysu.edu.cn (L.-H.Q.); zhengl33@mail.sysu.edu.cn (L.-L.Z.); Tel.: +86-20-84112517 (L.-L.Z.)

† These authors share equal senior authorship.

**Table S1.** Comparative Analysis of Features between GateView and Other Databases.

| Data_items                    | VirusReceptor | Viralzone | GateView                               |
|-------------------------------|---------------|-----------|----------------------------------------|
| Family                        | ✓             | ✓         | ✓                                      |
| Taxonomy                      | ✓             | ✓         | ✓                                      |
| Virion                        | ✓             | ✓         | ✓                                      |
| Receptor                      | ✓             | ✓         | ✓                                      |
| Function                      |               | ✓         | ✓                                      |
| Viral protein                 |               | ✓         | ✓                                      |
| Type                          | ✓             | ✓         | ✓                                      |
| Literature                    | ✓             |           | ✓                                      |
| Receptor detailed information | ✓             |           | ✓                                      |
| <b>Improved features</b>      |               |           |                                        |
| Population (Sex, Age)         |               |           | 17382 samples / 30 tissue              |
| Smoking history               |               |           | 33 sample / Lung                       |
| Cancer                        |               |           | 10327 samples / 33 type                |
| Single Cells                  |               |           | 28 samples / 24 tissue / 1061868 cells |
| Cell Lines                    |               |           | 64 strains                             |
| Basic disease                 |               |           | 13 samples / 8 type                    |
| Embryo Development            |               |           | 35 samples / 6 tissues                 |
| Placenta Development          |               |           | 3 samples                              |
| Evolution                     |               |           | 74 homology groups / 21 species        |

**Table S2.** The results of the comparison between human ACE2 protein and its homologs.

| Accession ID   | Taxonomy                      | Identity | Similarity |
|----------------|-------------------------------|----------|------------|
| NP_068576.1    | <i>Homo sapiens</i>           | 100.00%  | 100.00%    |
| XP_016798468.1 | <i>Pan troglodytes</i>        | 99.01%   | 99.38%     |
| NP_001129168.1 | <i>Macaca mulatta</i>         | 94.91%   | 97.52%     |
| NP_001158732.1 | <i>Canis lupus familiaris</i> | 83.48%   | 91.80%     |
| NP_001019673.2 | <i>Bos taurus</i>             | 80.99%   | 90.56%     |

|                |                               |        |        |
|----------------|-------------------------------|--------|--------|
| NP_001012006.1 | <i>Rattus norvegicus</i>      | 82.48% | 90.06% |
| NP_001123985.1 | <i>Mus musculus</i>           | 82.11% | 89.57% |
| XP_416822.3    | <i>Gallus gallus</i>          | 65.44% | 79.34% |
| XP_002938293.2 | <i>Xenopus tropicalis</i>     | 55.67% | 69.68% |
| NP_001007298.1 | <i>Danio rerio</i>            | 55.73% | 69.76% |
| NP_001024453.1 | <i>Caenorhabditis elegans</i> | 20.32% | 35.01% |

**Table S3.** The list of source databases for the original data integrated in GateView.

| Database            | Website                                                                                                                   | Download time |
|---------------------|---------------------------------------------------------------------------------------------------------------------------|---------------|
| ViralZone           | <a href="https://viralzone.expasy.org/">https://viralzone.expasy.org/</a>                                                 | 2020.04.12    |
| viralReceptor       | <a href="http://www.computationalbiology.cn:5000/viralReceptor">http://www.computationalbiology.cn:5000/viralReceptor</a> | 2020.4.15     |
| ViralHostDB         | <a href="https://www.genome.jp/virushostdb/">https://www.genome.jp/virushostdb/</a>                                       | 2020.04.25    |
| HomoloGenes         | <a href="https://ftp.ncbi.nih.gov/pub/HomoloGene/last-archive/">https://ftp.ncbi.nih.gov/pub/HomoloGene/last-archive/</a> | 2020.05.15    |
| GTEX                | <a href="https://gtexportal.org/home/downloads/">https://gtexportal.org/home/downloads/</a>                               | 2020.05.08    |
| TCGA                | <a href="https://portal.gdc.cancer.gov/">https://portal.gdc.cancer.gov/</a>                                               | 2020.06.18    |
| CCA                 | <a href="https://www.covid19cellatlas.org/">https://www.covid19cellatlas.org/</a>                                         | 2020.07.01    |
| HCA                 | <a href="https://www.humancellatlas.org/">https://www.humancellatlas.org/</a>                                             | 2020.07.13    |
| 10X Genomic         | <a href="https://www.10xgenomics.com/cn/datasets">https://www.10xgenomics.com/cn/datasets</a>                             | 2020.08.03    |
| RMBase              | <a href="https://rna.sysu.edu.cn/rmbase/">https://rna.sysu.edu.cn/rmbase/</a>                                             | 2020.08.12    |
| dbSNP               | <a href="https://www.ncbi.nlm.nih.gov/snp/">https://www.ncbi.nlm.nih.gov/snp/</a>                                         | 2020.08.15    |
| Human Protein Atlas | <a href="https://www.proteinatlas.org/">https://www.proteinatlas.org/</a>                                                 | 2020.08.18    |

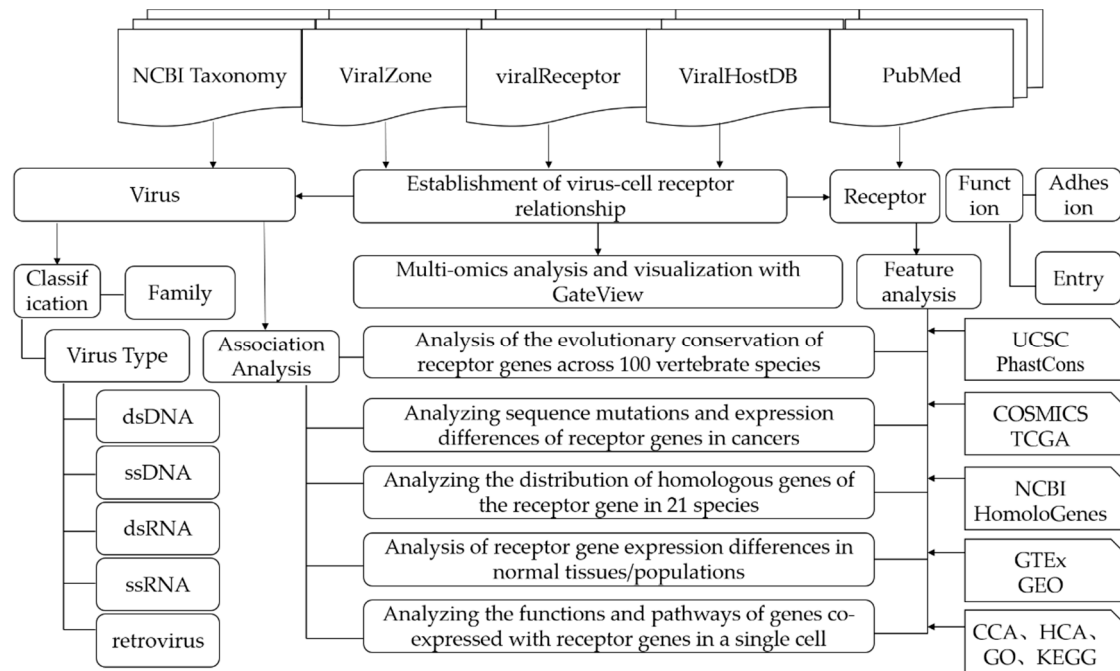

**Figure S1.** The workflow of Gateview.

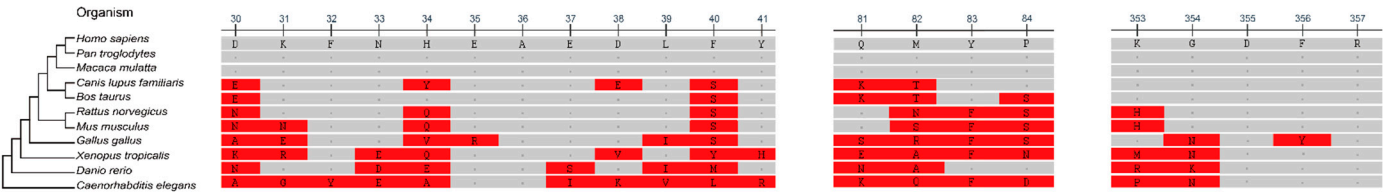

**Figure S2.** The comparison between the SARS-CoV-2 virus S protein binding regions of the human ACE2 protein and the proteins encoded by homologous genes of the human ACE2 gene in different species. Left: The Maximum Likelihood tree. Right: Multiple sequence alignment of the key regions. Different residues are highlighted in red.
